# Supplementary material
Source: HighWire-hosted journal article supplement (https://jnm.snmjournals.org/highwire/filestream/94372/field_highwire_adjunct_files/0/111393_Supplemental_Data.pdf)
Supplement: 111393_Supplemental_Data.pdf [file 111393_Supplemental_Data.pdf]

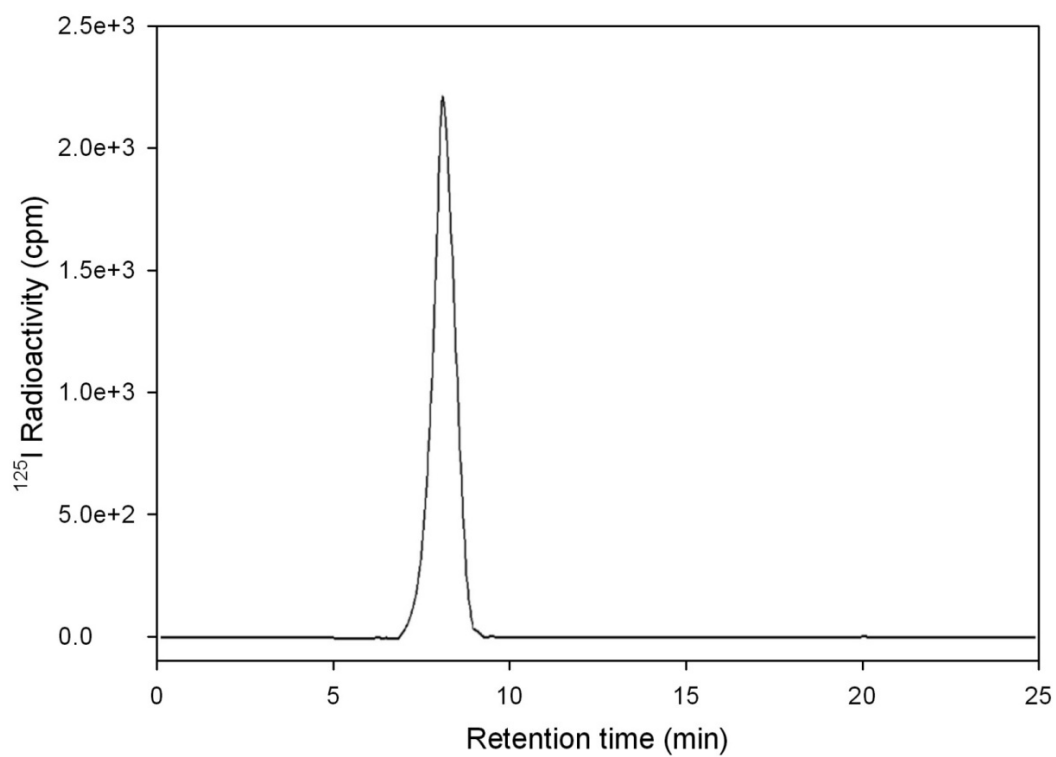

SUPPLEMENTAL FIGURE 1. Analytical radio-HPLC chromatogram of  $^{125}\text{I}$ -rECP after purification of the radioligand employing a PD10 column. The retention time (Rt) of  $^{125}\text{I}$ -rECP is 8.5 min.

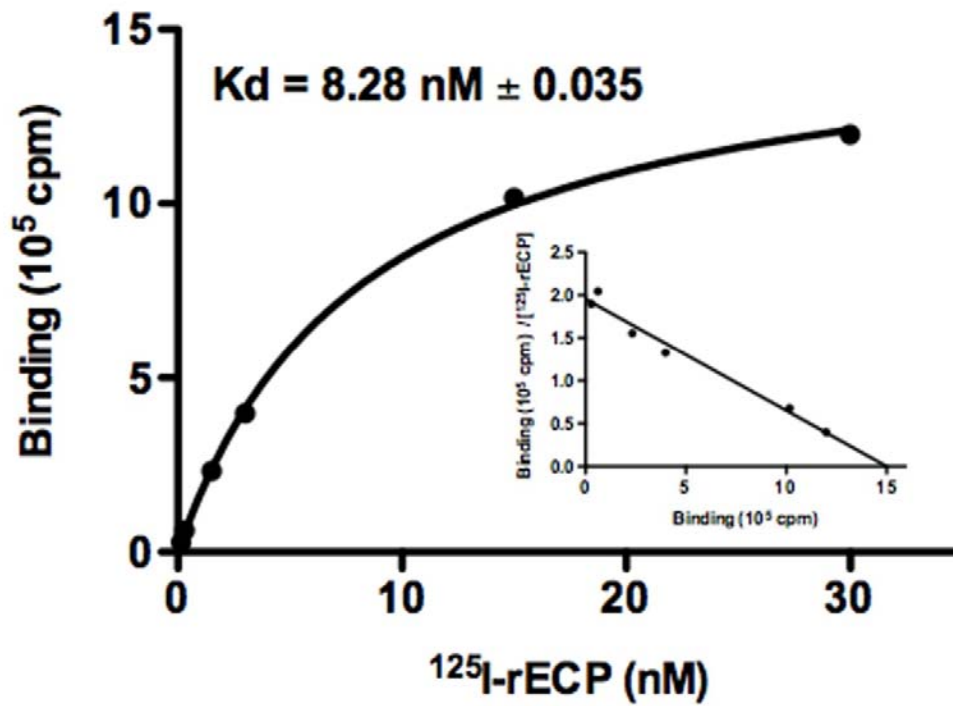

SUPPLEMENTAL FIGURE 2. Saturation plots for  $^{125}\text{I-rECP}$  binding in Beas-2B

cells. Each point represents mean  $\pm$  standard deviation of triplicate measurements.

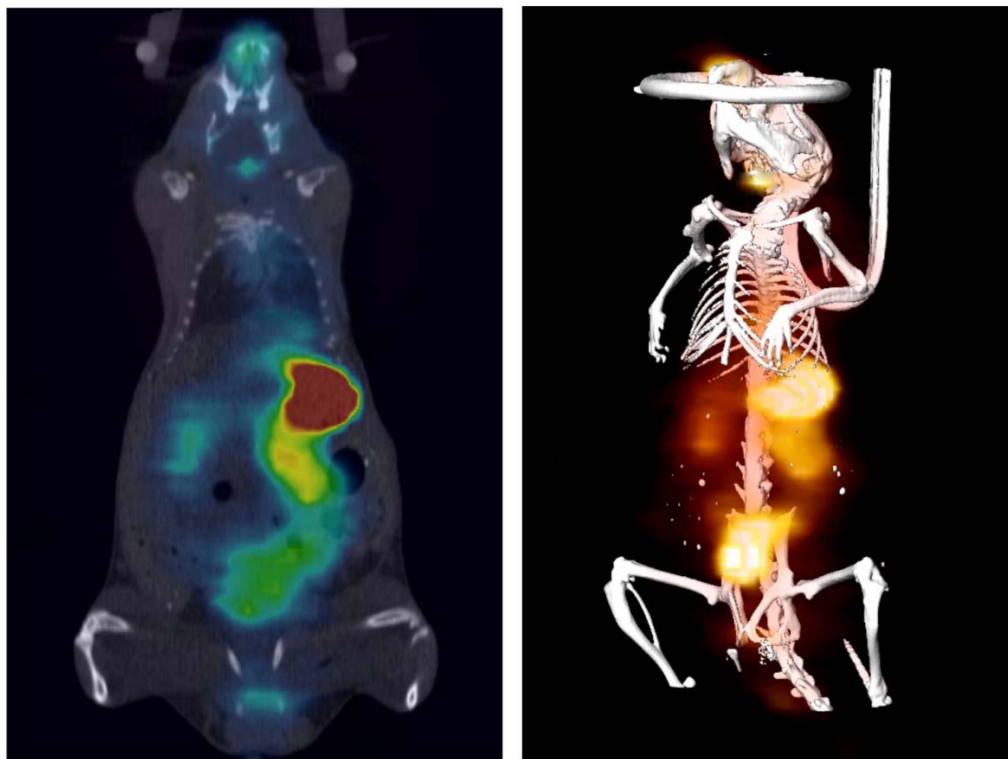

SUPPLEMENTAL FIGURE 3. SPECT/CT imaging of  $^{123}\text{I}$ -rECP in normal mice at 1 h post-injection.

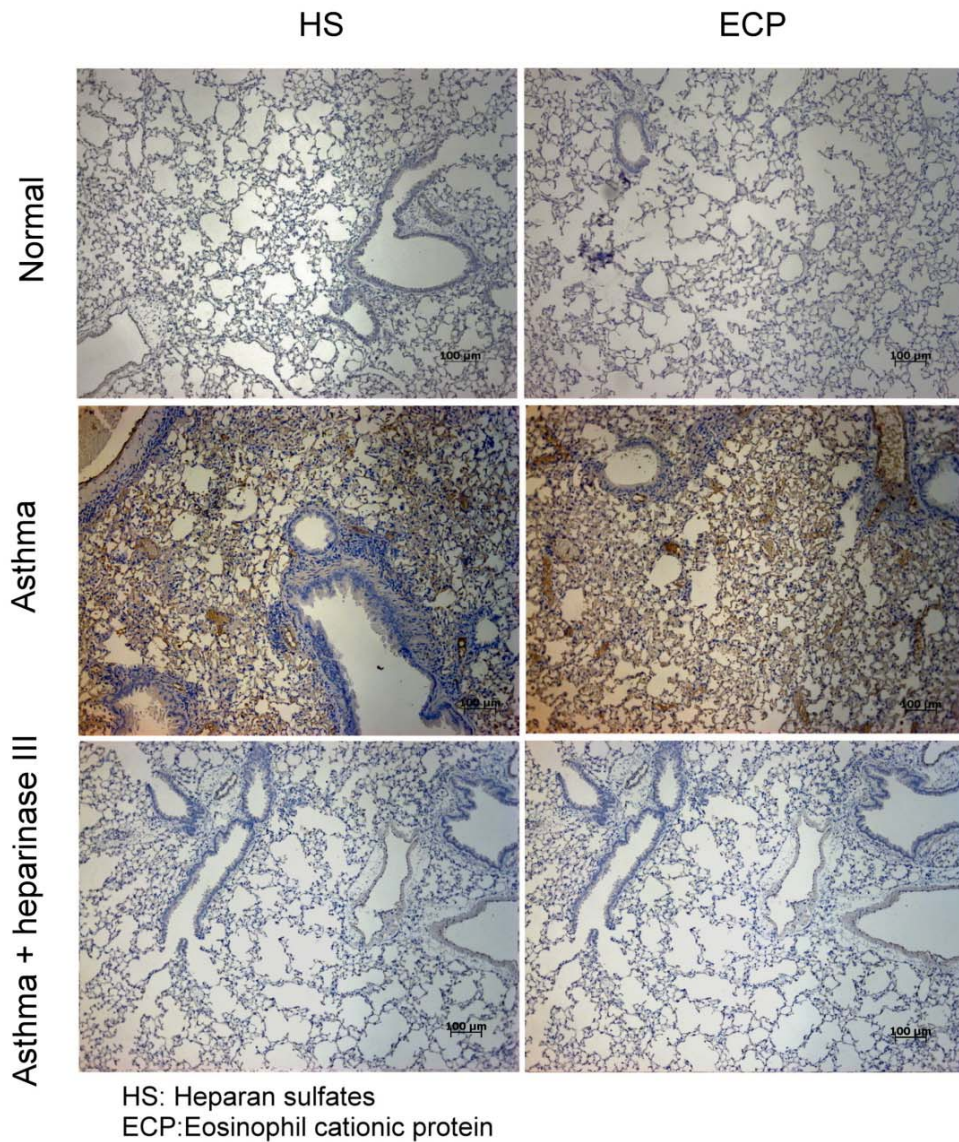

SUPPLEMENTAL FIGURE 4. Immunohistochemical analysis of HS and rECP in lung tissues from asthma mice and normal mice with or without heparinase III treatment. Mice were intravenously injected with 1 nmol of rECP at 24 h after heparinase III treatment. At 1 h post-injection, mice were sacrificed, and their lungs were removed for HS and rECP immunostaining.
